# Supplementary material for: The formation mechanism of Sc-based metallofullerenes: a molecular dynamics simulation study
Source: Royal Society of Chemistry journal article supplement (doi:10.1039/d3cp05587f), 2024-01-01
Supplement: d3cp05587f1.pdf [file d3cp05587f1.pdf]

## Supplementary Material

# The formation mechanism of Sc-based metallofullerenes: A molecular dynamics simulation study

Huichen Fan<sup>1</sup>, Zhenyu Liu<sup>1</sup>, Li-Hua Gan<sup>1\*</sup> and Chun-Ru Wang<sup>2</sup>

<sup>1</sup>School of Chemistry and Chemical Engineering, Southwest University, Chongqing 400715 China

<sup>2</sup>Institute of Chemistry, Chinese Academy of Sciences, Beijing 100190 China

E-mail: [ganlh@swu.edu.cn](mailto:ganlh@swu.edu.cn)

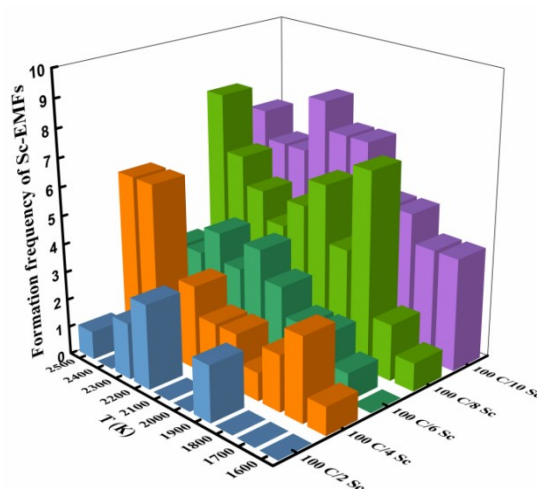

Fig. S1 Frequency forming Sc-EMFs in each system at various temperatures within 500 ps.

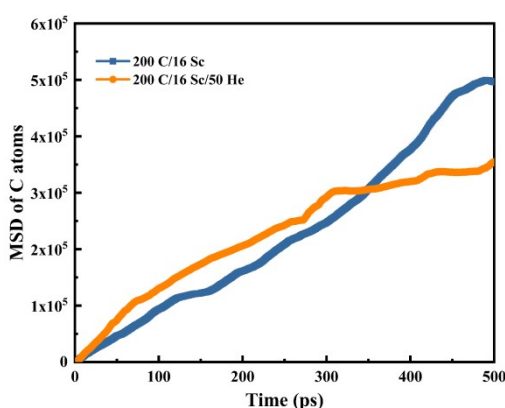

Fig. S2 The MSD of carbon atoms within 500 ps.

Table S1 The key geometrical parameters of Sc<sub>2</sub>C<sub>2</sub>@C<sub>84</sub> from DFT/6-31G and CSc.ff

| Bond(Å)                          | DFT/6-31G | CSc.ff | Angle(°)                                          | DFT/6-31G | CSc.ff |
|----------------------------------|-----------|--------|---------------------------------------------------|-----------|--------|
| C <sub>1</sub> -C <sub>2</sub>   | 1.446     | 1.455  | C <sub>2</sub> -C <sub>1</sub> -C <sub>3</sub>    | 118.5     | 118.4  |
| C <sub>1</sub> -C <sub>3</sub>   | 1.458     | 1.454  | C <sub>2</sub> -C <sub>1</sub> -C <sub>4</sub>    | 118.6     | 118.4  |
| C <sub>1</sub> -C <sub>4</sub>   | 1.457     | 1.454  | C <sub>1</sub> -C <sub>2</sub> -C <sub>5</sub>    | 118.6     | 118.4  |
| C <sub>2</sub> -C <sub>5</sub>   | 1.457     | 1.454  | C <sub>1</sub> -C <sub>2</sub> -C <sub>6</sub>    | 118.5     | 118.4  |
| C <sub>2</sub> -C <sub>6</sub>   | 1.458     | 1.454  | C <sub>1</sub> -C <sub>3</sub> -C <sub>7</sub>    | 123.4     | 122.9  |
| C <sub>3</sub> -C <sub>7</sub>   | 1.451     | 1.448  | C <sub>2</sub> -C <sub>5</sub> -C <sub>8</sub>    | 123.4     | 122.9  |
| C <sub>5</sub> -C <sub>8</sub>   | 1.452     | 1.448  | C <sub>1</sub> -C <sub>4</sub> -C <sub>9</sub>    | 123.4     | 122.9  |
| C <sub>4</sub> -C <sub>9</sub>   | 1.452     | 1.448  | C <sub>2</sub> -C <sub>6</sub> -C <sub>10</sub>   | 123.4     | 122.9  |
| C <sub>6</sub> -C <sub>10</sub>  | 1.451     | 1.448  | C <sub>1</sub> -C <sub>3</sub> -C <sub>11</sub>   | 108.3     | 107.9  |
| C <sub>3</sub> -C <sub>11</sub>  | 1.451     | 1.453  | C <sub>3</sub> -C <sub>11</sub> -C <sub>12</sub>  | 108.2     | 108.1  |
| C <sub>11</sub> -C <sub>12</sub> | 1.433     | 1.446  | C <sub>2</sub> -C <sub>5</sub> -C <sub>13</sub>   | 108.3     | 107.9  |
| C <sub>5</sub> -C <sub>13</sub>  | 1.450     | 1.453  | C <sub>5</sub> -C <sub>13</sub> -C <sub>14</sub>  | 108.2     | 108.1  |
| C <sub>13</sub> -C <sub>14</sub> | 1.433     | 1.453  | C <sub>3</sub> -C <sub>7</sub> -C <sub>15</sub>   | 116.2     | 115.1  |
| C <sub>7</sub> -C <sub>15</sub>  | 1.411     | 1.443  | C <sub>5</sub> -C <sub>8</sub> -C <sub>16</sub>   | 116.1     | 115.2  |
| C <sub>8</sub> -C <sub>16</sub>  | 1.411     | 1.443  | C <sub>4</sub> -C <sub>9</sub> -C <sub>17</sub>   | 116.1     | 115.2  |
| C <sub>9</sub> -C <sub>17</sub>  | 1.411     | 1.444  | C <sub>6</sub> -C <sub>10</sub> -C <sub>18</sub>  | 116.2     | 115.1  |
| C <sub>10</sub> -C <sub>18</sub> | 1.411     | 1.443  | C <sub>3</sub> -C <sub>11</sub> -C <sub>19</sub>  | 123.4     | 124.2  |
| C <sub>11</sub> -C <sub>19</sub> | 1.430     | 1.441  | C <sub>11</sub> -C <sub>12</sub> -C <sub>20</sub> | 121.9     | 120.9  |
| C <sub>12</sub> -C <sub>20</sub> | 1.430     | 1.441  | C <sub>5</sub> -C <sub>13</sub> -C <sub>21</sub>  | 123.4     | 124.2  |
| C <sub>13</sub> -C <sub>21</sub> | 1.430     | 1.441  | C <sub>13</sub> -C <sub>14</sub> -C <sub>22</sub> | 121.9     | 120.9  |
| C <sub>14</sub> -C <sub>22</sub> | 1.430     | 1.441  | C <sub>11</sub> -C <sub>19</sub> -C <sub>23</sub> | 115.5     | 113.8  |
| C <sub>19</sub> -C <sub>23</sub> | 1.420     | 1.441  | C <sub>13</sub> -C <sub>21</sub> -C <sub>24</sub> | 115.5     | 113.8  |
| C <sub>21</sub> -C <sub>24</sub> | 1.419     | 1.441  | C <sub>12</sub> -C <sub>20</sub> -C <sub>25</sub> | 115.5     | 113.9  |
| C <sub>20</sub> -C <sub>25</sub> | 1.419     | 1.441  | C <sub>14</sub> -C <sub>22</sub> -C <sub>26</sub> | 115.5     | 113.8  |
| C <sub>22</sub> -C <sub>26</sub> | 1.420     | 1.441  | C <sub>7</sub> -C <sub>15</sub> -C <sub>27</sub>  | 120.4     | 120.0  |
| C <sub>15</sub> -C <sub>27</sub> | 1.447     | 1.430  | C <sub>15</sub> -C <sub>27</sub> -C <sub>28</sub> | 120.5     | 120.7  |

---

|                                  |       |       |                                                   |       |       |
|----------------------------------|-------|-------|---------------------------------------------------|-------|-------|
| C <sub>27</sub> -C <sub>28</sub> | 1.385 | 1.407 | C <sub>9</sub> -C <sub>17</sub> -C <sub>29</sub>  | 120.4 | 120.0 |
| C <sub>17</sub> -C <sub>29</sub> | 1.447 | 1.430 | C <sub>17</sub> -C <sub>29</sub> -C <sub>30</sub> | 120.5 | 120.7 |
| C <sub>29</sub> -C <sub>30</sub> | 1.385 | 1.406 | C <sub>11</sub> -C <sub>19</sub> -C <sub>31</sub> | 118.1 | 118.2 |
| C <sub>19</sub> -C <sub>31</sub> | 1.469 | 1.443 | C <sub>12</sub> -C <sub>20</sub> -C <sub>32</sub> | 118.1 | 118.2 |
| C <sub>20</sub> -C <sub>32</sub> | 1.469 | 1.443 | C <sub>13</sub> -C <sub>21</sub> -C <sub>33</sub> | 118.1 | 118.2 |
| C <sub>21</sub> -C <sub>33</sub> | 1.469 | 1.443 | C <sub>14</sub> -C <sub>22</sub> -C <sub>34</sub> | 118.1 | 118.2 |
| C <sub>22</sub> -C <sub>34</sub> | 1.469 | 1.443 | C <sub>19</sub> -C <sub>23</sub> -C <sub>35</sub> | 120.3 | 119.8 |
| C <sub>23</sub> -C <sub>35</sub> | 1.436 | 1.424 | C <sub>21</sub> -C <sub>24</sub> -C <sub>36</sub> | 120.4 | 119.9 |
| C <sub>24</sub> -C <sub>36</sub> | 1.436 | 1.424 | C <sub>20</sub> -C <sub>25</sub> -C <sub>37</sub> | 120.4 | 119.9 |
| C <sub>25</sub> -C <sub>37</sub> | 1.436 | 1.424 | C <sub>22</sub> -C <sub>26</sub> -C <sub>38</sub> | 120.3 | 119.8 |
| C <sub>26</sub> -C <sub>38</sub> | 1.436 | 1.424 | C <sub>15</sub> -C <sub>27</sub> -C <sub>39</sub> | 109.1 | 109.0 |
| C <sub>27</sub> -C <sub>39</sub> | 1.439 | 1.431 | C <sub>27</sub> -C <sub>28</sub> -C <sub>40</sub> | 119.9 | 119.6 |
| C <sub>28</sub> -C <sub>40</sub> | 1.439 | 1.431 | C <sub>17</sub> -C <sub>29</sub> -C <sub>41</sub> | 109.1 | 109.0 |
| C <sub>29</sub> -C <sub>41</sub> | 1.439 | 1.431 | C <sub>29</sub> -C <sub>30</sub> -C <sub>42</sub> | 119.9 | 119.7 |
| C <sub>30</sub> -C <sub>42</sub> | 1.439 | 1.431 | C <sub>19</sub> -C <sub>31</sub> -C <sub>43</sub> | 116.6 | 115.5 |
| C <sub>31</sub> -C <sub>43</sub> | 1.422 | 1.443 | C <sub>20</sub> -C <sub>32</sub> -C <sub>44</sub> | 116.6 | 115.5 |
| C <sub>32</sub> -C <sub>44</sub> | 1.422 | 1.444 | C <sub>21</sub> -C <sub>33</sub> -C <sub>45</sub> | 116.6 | 115.5 |
| C <sub>33</sub> -C <sub>45</sub> | 1.422 | 1.444 | C <sub>22</sub> -C <sub>34</sub> -C <sub>46</sub> | 116.6 | 115.5 |
| C <sub>34</sub> -C <sub>46</sub> | 1.422 | 1.443 | C <sub>23</sub> -C <sub>35</sub> -C <sub>47</sub> | 119.7 | 119.4 |
| C <sub>35</sub> -C <sub>47</sub> | 1.384 | 1.403 | C <sub>25</sub> -C <sub>37</sub> -C <sub>48</sub> | 119.7 | 119.4 |
| C <sub>36</sub> -C <sub>48</sub> | 1.384 | 1.403 | C <sub>24</sub> -C <sub>36</sub> -C <sub>49</sub> | 119.7 | 119.3 |
| C <sub>37</sub> -C <sub>49</sub> | 1.384 | 1.403 | C <sub>26</sub> -C <sub>38</sub> -C <sub>50</sub> | 119.7 | 119.4 |
| C <sub>38</sub> -C <sub>50</sub> | 1.384 | 1.403 | C <sub>27</sub> -C <sub>39</sub> -C <sub>51</sub> | 121.6 | 121.5 |
| C <sub>39</sub> -C <sub>51</sub> | 1.422 | 1.443 | C <sub>28</sub> -C <sub>40</sub> -C <sub>52</sub> | 121.6 | 121.5 |
| C <sub>40</sub> -C <sub>52</sub> | 1.422 | 1.443 | C <sub>29</sub> -C <sub>41</sub> -C <sub>53</sub> | 121.6 | 121.5 |
| C <sub>41</sub> -C <sub>53</sub> | 1.422 | 1.443 | C <sub>30</sub> -C <sub>42</sub> -C <sub>54</sub> | 121.6 | 121.5 |
| C <sub>42</sub> -C <sub>54</sub> | 1.422 | 1.443 | C <sub>31</sub> -C <sub>43</sub> -C <sub>55</sub> | 121.8 | 121.6 |
| C <sub>43</sub> -C <sub>55</sub> | 1.440 | 1.431 | C <sub>43</sub> -C <sub>55</sub> -C <sub>56</sub> | 119.8 | 119.6 |
| C <sub>55</sub> -C <sub>56</sub> | 1.384 | 1.406 | C <sub>33</sub> -C <sub>45</sub> -C <sub>57</sub> | 121.7 | 121.6 |

---

|                                  |       |       |                                                    |       |       |
|----------------------------------|-------|-------|----------------------------------------------------|-------|-------|
| C <sub>45</sub> -C <sub>57</sub> | 1.440 | 1.431 | C <sub>45</sub> -C <sub>57</sub> -C <sub>58</sub>  | 119.8 | 119.6 |
| C <sub>57</sub> -C <sub>58</sub> | 1.384 | 1.406 | C <sub>35</sub> -C <sub>47</sub> -C <sub>59</sub>  | 119.7 | 119.4 |
| C <sub>47</sub> -C <sub>59</sub> | 1.435 | 1.423 | C <sub>37</sub> -C <sub>48</sub> -C <sub>60</sub>  | 119.7 | 119.4 |
| C <sub>48</sub> -C <sub>60</sub> | 1.435 | 1.423 | C <sub>36</sub> -C <sub>49</sub> -C <sub>61</sub>  | 119.7 | 119.4 |
| C <sub>49</sub> -C <sub>61</sub> | 1.435 | 1.423 | C <sub>38</sub> -C <sub>50</sub> -C <sub>62</sub>  | 119.7 | 119.4 |
| C <sub>50</sub> -C <sub>62</sub> | 1.435 | 1.423 | C <sub>47</sub> -C <sub>59</sub> -C <sub>63</sub>  | 120.4 | 119.9 |
| C <sub>59</sub> -C <sub>63</sub> | 1.418 | 1.439 | C <sub>49</sub> -C <sub>61</sub> -C <sub>64</sub>  | 120.4 | 119.9 |
| C <sub>61</sub> -C <sub>64</sub> | 1.418 | 1.439 | C <sub>48</sub> -C <sub>60</sub> -C <sub>65</sub>  | 120.4 | 119.9 |
| C <sub>60</sub> -C <sub>65</sub> | 1.418 | 1.439 | C <sub>50</sub> -C <sub>62</sub> -C <sub>66</sub>  | 120.4 | 119.9 |
| C <sub>62</sub> -C <sub>66</sub> | 1.418 | 1.440 | C <sub>43</sub> -C <sub>55</sub> -C <sub>67</sub>  | 109.3 | 109.0 |
| C <sub>55</sub> -C <sub>67</sub> | 1.446 | 1.431 | C <sub>55</sub> -C <sub>56</sub> -C <sub>68</sub>  | 120.4 | 120.6 |
| C <sub>56</sub> -C <sub>68</sub> | 1.447 | 1.431 | C <sub>45</sub> -C <sub>57</sub> -C <sub>69</sub>  | 109.3 | 109.0 |
| C <sub>57</sub> -C <sub>69</sub> | 1.447 | 1.431 | C <sub>57</sub> -C <sub>58</sub> -C <sub>70</sub>  | 120.4 | 120.6 |
| C <sub>58</sub> -C <sub>70</sub> | 1.446 | 1.431 | C <sub>59</sub> -C <sub>63</sub> -C <sub>71</sub>  | 115.8 | 114.0 |
| C <sub>63</sub> -C <sub>71</sub> | 1.431 | 1.440 | C <sub>63</sub> -C <sub>71</sub> -C <sub>72</sub>  | 121.9 | 120.8 |
| C <sub>71</sub> -C <sub>72</sub> | 1.428 | 1.446 | C <sub>60</sub> -C <sub>65</sub> -C <sub>73</sub>  | 115.7 | 114.0 |
| C <sub>65</sub> -C <sub>73</sub> | 1.431 | 1.440 | C <sub>65</sub> -C <sub>73</sub> -C <sub>74</sub>  | 122.0 | 120.9 |
| C <sub>73</sub> -C <sub>74</sub> | 1.428 | 1.446 | C <sub>55</sub> -C <sub>67</sub> -C <sub>75</sub>  | 120.6 | 120.2 |
| C <sub>67</sub> -C <sub>75</sub> | 1.411 | 1.444 | C <sub>56</sub> -C <sub>68</sub> -C <sub>76</sub>  | 120.5 | 120.2 |
| C <sub>68</sub> -C <sub>76</sub> | 1.411 | 1.444 | C <sub>57</sub> -C <sub>69</sub> -C <sub>77</sub>  | 120.5 | 120.2 |
| C <sub>69</sub> -C <sub>77</sub> | 1.411 | 1.44  | C <sub>58</sub> -C <sub>70</sub> -C <sub>78</sub>  | 120.6 | 120.1 |
| C <sub>70</sub> -C <sub>78</sub> | 1.411 | 1.44  | C <sub>63</sub> -C <sub>71</sub> -C <sub>79</sub>  | 123.4 | 124.3 |
| C <sub>71</sub> -C <sub>79</sub> | 1.453 | 1.453 | C <sub>69</sub> -C <sub>77</sub> -C <sub>80</sub>  | 116.3 | 115.3 |
| C <sub>77</sub> -C <sub>80</sub> | 1.453 | 1.449 | C <sub>68</sub> -C <sub>76</sub> -C <sub>81</sub>  | 116.3 | 115.3 |
| C <sub>76</sub> -C <sub>81</sub> | 1.453 | 1.449 | C <sub>73</sub> -C <sub>74</sub> -C <sub>82</sub>  | 108.2 | 108.2 |
| C <sub>74</sub> -C <sub>82</sub> | 1.453 | 1.453 | C <sub>71</sub> -C <sub>79</sub> -C <sub>83</sub>  | 108.3 | 107.9 |
| C <sub>79</sub> -C <sub>83</sub> | 1.455 | 1.455 | C <sub>79</sub> -C <sub>83</sub> -C <sub>84</sub>  | 118.3 | 118.3 |
| C <sub>83</sub> -C <sub>84</sub> | 1.452 | 1.454 | C <sub>2</sub> -C <sub>1</sub> -Sc <sub>85</sub>   | 71.3  | 71.1  |
| C <sub>1</sub> -Sc <sub>85</sub> | 2.257 | 2.251 | C <sub>79</sub> -C <sub>83</sub> -Sc <sub>86</sub> | 79.0  | 79.7  |

---

|                  |       |       |                         |       |       |
|------------------|-------|-------|-------------------------|-------|-------|
| $C_{83}-Sc_{86}$ | 2.260 | 2.251 | $C_1-Sc_{85}-C_{87}$    | 145.1 | 145.6 |
| $Sc_{85}-C_{87}$ | 2.301 | 2.293 | $Sc_{85}-C_{87}-C_{88}$ | 73.8  | 74.4  |
| $C_{87}-C_{88}$  | 1.282 | 1.234 |                         |       |       |

---

39           ! Number of general parameters  
50.0000 !p\_boc1 Eq(4c): Overcoordination parameter  
9.5469 !p\_boc2 Eq(4d): Overcoordination parameter  
26.5405 !p\_coa2 Eq(15): Valency angle conjugation  
1.7224 !p\_trip4 Eq(20): Triple bond stabilisation  
6.8702 !p\_trip3 Eq(20): Triple bond stabilisation  
60.4850 !k\_c2 Eq(19): C2-correction  
1.0588 !p\_ovun6 Eq(12): Undercoordination  
4.6000 !p\_trip2 Eq(20): Triple bond stabilisation  
12.1176 !p\_ovun7 Eq(12): Undercoordination  
13.3056 !p\_ovun8 Eq(12): Undercoordination  
-70.5044 !p\_trip1 Eq(20): Triple bond stabilization  
0.0000 !Lower Taper-radius (must be 0)  
10.0000 !R\_cut Eq(21): Upper Taper-radius  
2.8793 !p\_fe1 Eq(6a): Fe dimer correction  
33.8667 !p\_val6 Eq(13c): Valency undercoordination  
6.0891 !p\_lp1 Eq(8): Lone pair param  
1.0563 !p\_val9 Eq(13f): Valency angle exponent  
2.0384 !p\_val10 Eq(13g): Valency angle parameter  
6.1431 !p\_fe2 Eq(6a): Fe dimer correction  
6.9290 !p\_pen2 Eq(14a): Double bond/angle param  
0.3989 !p\_pen3 Eq(14a): Double bond/angle param  
3.9954 !p\_pen4 Eq(14a): Double bond/angle param  
-2.4837 !p\_fe3 Eq(6a): Fe dimer correction  
5.7796 !p\_tor2 Eq(16b): Torsion/BO parameter  
10.0000 !p\_tor3 Eq(16c): Torsion overcoordination  
1.9487 !p\_tor4 Eq(16c): Torsion overcoordination  
-1.2327 !p\_elho Eq(26a): electron-hole interaction  
2.1645 !p\_cot2 Eq(17b): Conjugation if tors13=0  
1.5591 !p\_vdW1 Eq(23b): vdWaals shielding  
0.1000 !Cutoff for bond order (\*100)  
2.1365 !p\_coa4 Eq(15): Valency angle conjugation  
0.6991 !p\_ovun4 Eq(11b): Over/Undercoordination  
50.0000 !p\_ovun3 Eq(11b): Over/Undercoordination  
1.8512 !p\_val8 Eq(13d): Valency/lone pair param  
0.5000 !X\_soft Eq(25): ACKS2 softness for X\_ij  
20.0000 !d Eq(23d): Scale factor in lg-dispersion  
5.0000 !p\_val Eq(27): Gauss exponent for electrons  
0.0000 !1 Eq(13e): disable undecoord in val angle  
2.6962 !p\_coa3 Eq(15): Valency angle conjugation

4           ! Nr of atoms; cov.r; valency;a.m;Rvdw;Evdw;gammaEEM;cov.r2;#  
          alfa;gammavdW;valency;Eunder;Eover;chiEEM;etaEEM;n.u.  
          cov r3;Elp;Heat inc.;bo131;bo132;bo133;softcut;n.u.

```

ov/un;vall;n.u.;val3,vval4
C  1.3674  4.0000 12.0000  2.0453  0.1444  0.8458  1.1706  4.0000
   9.0000  1.5000  4.0000 29.4878 79.5548  5.4674  6.0000  0.0000
   1.1668  0.0000 181.0000 14.2732 24.4406  6.7313  0.8558  0.0000
  -3.9334  5.0008  1.0564  4.0000  2.9663  0.0500  0.0000  0.0000
H   0.8930  1.0000  1.0080  1.3550  0.0930  0.8203 -0.1000  1.0000
   8.2230 33.2894  1.0000  0.0000 121.1250  3.7248  9.6093  1.0000
  -0.1000  0.0000 55.1878  3.0408  2.4197  0.0003  1.0698  0.0000
 -19.4571  4.2733  1.0338  1.0000  2.8793  0.0000  0.0000  0.0000
Sc  0.0902  3.0000 44.9559  0.9956  0.1498  0.0050 -0.0500  3.0000
  10.9962  1.0000  3.0000 13.8863 86.7409  5.4999  9.2045  0.0000
  -1.0000  0.0000 91.7672  0.0068  0.0051  5.2540  1.1007  0.0000
   0.0000  2.0733  1.0094  1.6000  2.9861  0.0000  0.0000  0.0000
He -0.1000  2.0000  4.0026  1.3000  0.0050  0.5000 -0.1000  4.0000
  12.0000  4.0000  4.0000  0.0000  0.0000  5.0000 13.0000  0.0000
  -0.1000  0.0000 -2.3700  6.4918  8.5961  0.2368 10.8563  0.0000
  -5.0000  3.1873  1.0338  6.2998  2.5791  2.0000  3.0000 11.5000
6   ! Nr of bonds; Edis1;LPpen;n.u.;pbe1;pbo5;l3corr;pbo6
      pbe2;pbo3;pbo4;n.u.;pbo1;pbo2;ovcorr
1  1  88.8853 107.9956 52.0729  0.5218 -0.3647  1.0000 34.9982  0.7768
   6.1249 -0.1693  8.0821  1.0000 -0.0586  8.1832  1.0000  0.0000
1  2 169.4760  0.0000  0.0000 -0.6083  0.0000  1.0000  6.0000  0.7652
   5.2290  1.0000  0.0000  1.0000 -0.0553  6.9316  0.0000  0.0000
2  2 153.3934  0.0000  0.0000 -0.4600  0.0000  1.0000  6.0000  0.7300
   6.2500  1.0000  0.0000  1.0000 -0.0790  6.0552  0.0000  0.0000
1  3  78.0000  0.0000  0.0000  0.2500 -0.5000  1.0000 45.0000  0.6000
   0.4000 -0.2500 15.0000  1.0000 -0.1000 10.0000  1.0000  0.0000
2  3  0.0000  0.0000  0.0000 -0.1577  0.0000  1.0000  6.0000  0.5000
   17.8821  1.0000  0.0000  1.0000 -0.2095  6.3931  0.0000  0.0000
3  3 56.8290  0.0000  0.0000  0.6031 -0.2000  0.0000 16.0000  0.4442
   0.4759 -0.2000 15.0000  1.0000 -0.1789  8.7946  0.0000  0.0000
2   ! Nr of off-diagonal terms; Ediss;Ro;gamma;rsigma;rpi;rpi2
1  2  0.1239  1.4004  9.8467  1.1210 -1.0000 -1.0000
1  3  0.0840  1.6500 10.5600  1.2900 -1.0000 -1.0000
6   ! Nr of angles;at1;at2;at3;Thetao,o;ka;kb;pv1;pv2
1  1  1  68.1748 30.9669  0.9699  0.0000  0.0082  0.3589  2.5747
1  1  2  65.7758 14.5234  6.2481  0.0000  0.5665  0.0000  1.6255
2  1  2  70.2607 25.2202  3.7312  0.0000  0.0050  0.0000  2.7500
1  2  2  0.0000  0.0000  6.0000  0.0000  0.0000  0.0000  1.0400
1  2  1  0.0000  3.4110  7.7350  0.0000  0.0000  0.0000  1.0400
2  2  2  0.0000 27.9213  5.8635  0.0000  0.0000  0.0000  1.0400
6   ! Nr of torsions;at1;at2;at3;at4;;V1;V2;V3;V2(BO);vconj;n.u;n
1  1  1  1  2.1207 26.8713  0.5160 -9.0000 -2.8394  0.0000  0.0000
1  1  1  2 -0.2500 29.2131  0.2945 -4.9581 -2.1802  0.0000  0.0000

```

|   |   |   |   |         |         |        |         |         |        |        |
|---|---|---|---|---------|---------|--------|---------|---------|--------|--------|
| 2 | 1 | 1 | 2 | -0.2500 | 31.2081 | 0.4539 | -4.8923 | -2.2677 | 0.0000 | 0.0000 |
| 0 | 1 | 2 | 0 | 0.0000  | 0.0000  | 0.0000 | 0.0000  | 0.0000  | 0.0000 | 0.0000 |
| 0 | 2 | 2 | 0 | 0.0000  | 0.0000  | 0.0000 | 0.0000  | 0.0000  | 0.0000 | 0.0000 |
| 0 | 1 | 1 | 0 | 0.0000  | 50.0000 | 0.3000 | -4.0000 | -2.0000 | 0.0000 | 0.0000 |

0 ! Nr of hydrogen bonds;at1;at2;at3;Rhb;Dehb;vhb1
